# Supplementary material for: Injectable thermosensitive hydrogel to enhance the photothermal ablation and systemic immunotherapy of breast tumors
Source: Royal Society of Chemistry journal article supplement (doi:10.1039/d2bm01037b), 2022-01-01
Supplement: d2bm01037b1.pdf [file d2bm01037b1.pdf]

## Supporting Information

# **Injectable Thermosensitive Hydrogel to Enhance Photothermal Ablation and Systemic Immunotherapy of Breast Tumors**

*Tao Qin, Ruipeng Li, Huiqin Jin, Yunxia Wang\* and Liheng Feng\**

School of Chemistry and Chemical Engineering, Shanxi University, Taiyuan, 030006,

P.R. China

E-mail: [wangyunxia@sxu.edu.cn](mailto:wangyunxia@sxu.edu.cn) (Wang, Y.X.); [lhfeng@sxu.edu.cn](mailto:lhfeng@sxu.edu.cn) (Feng, L.H.)

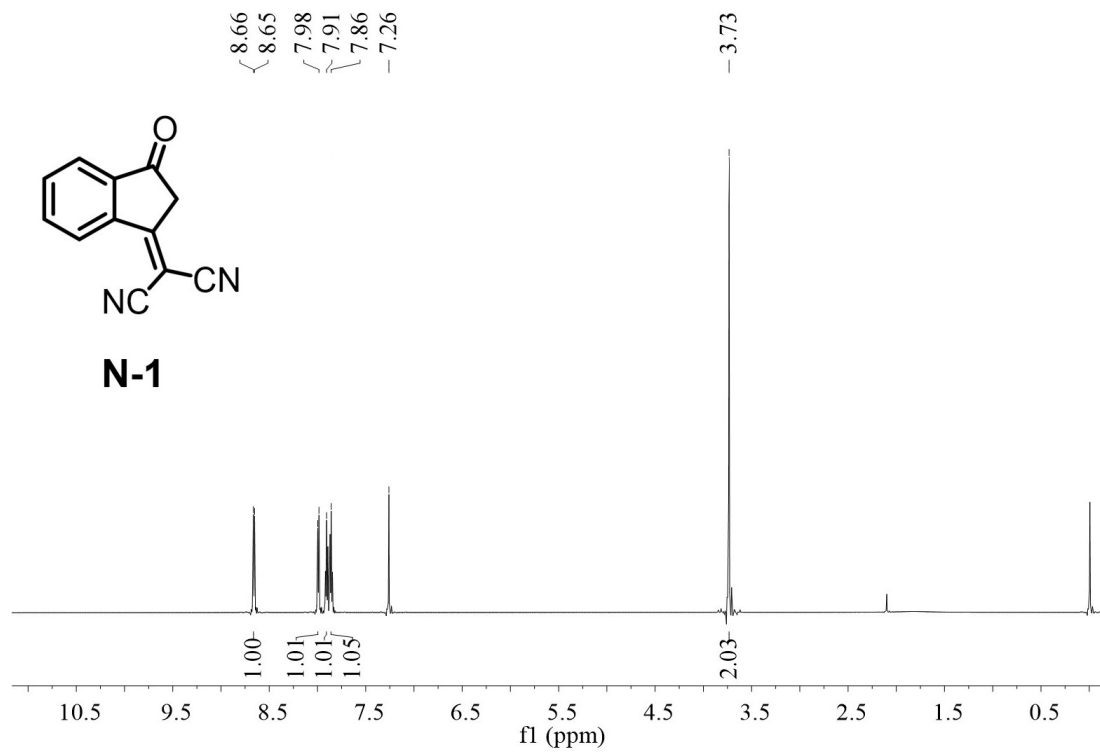

**Fig. S1.** <sup>1</sup>H NMR spectrum of N-1 in CDCl<sub>3</sub>.

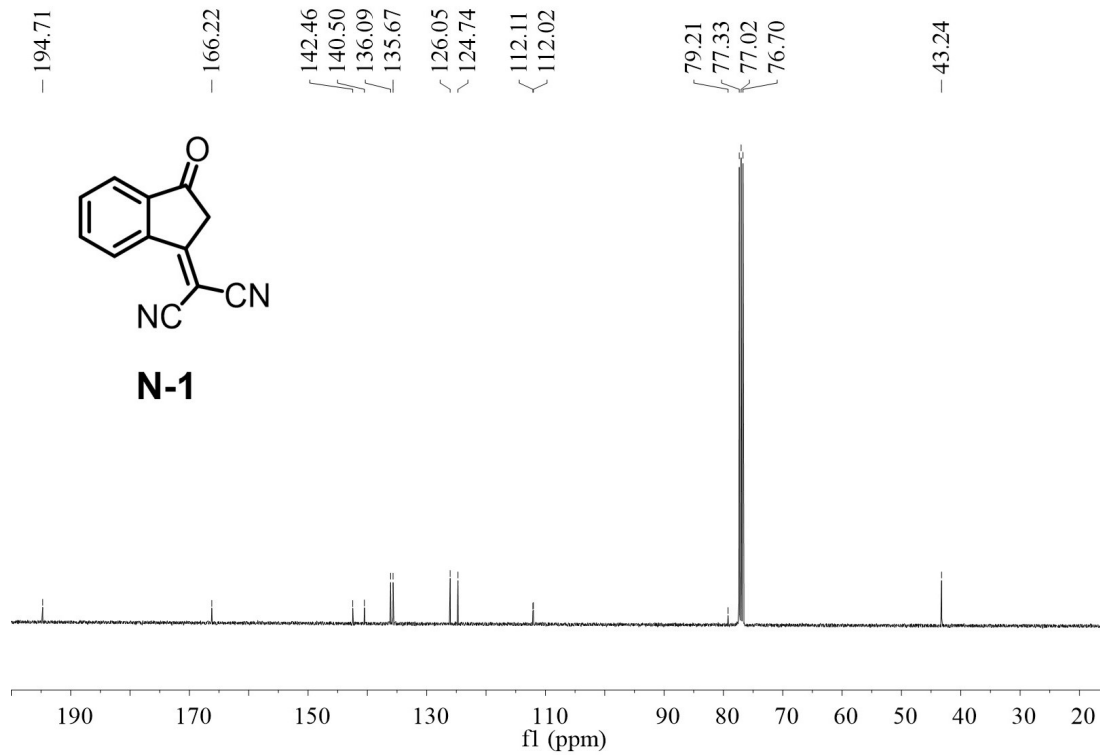

**Fig. S2.** <sup>13</sup>C NMR spectrum of N-1 in CDCl<sub>3</sub>.

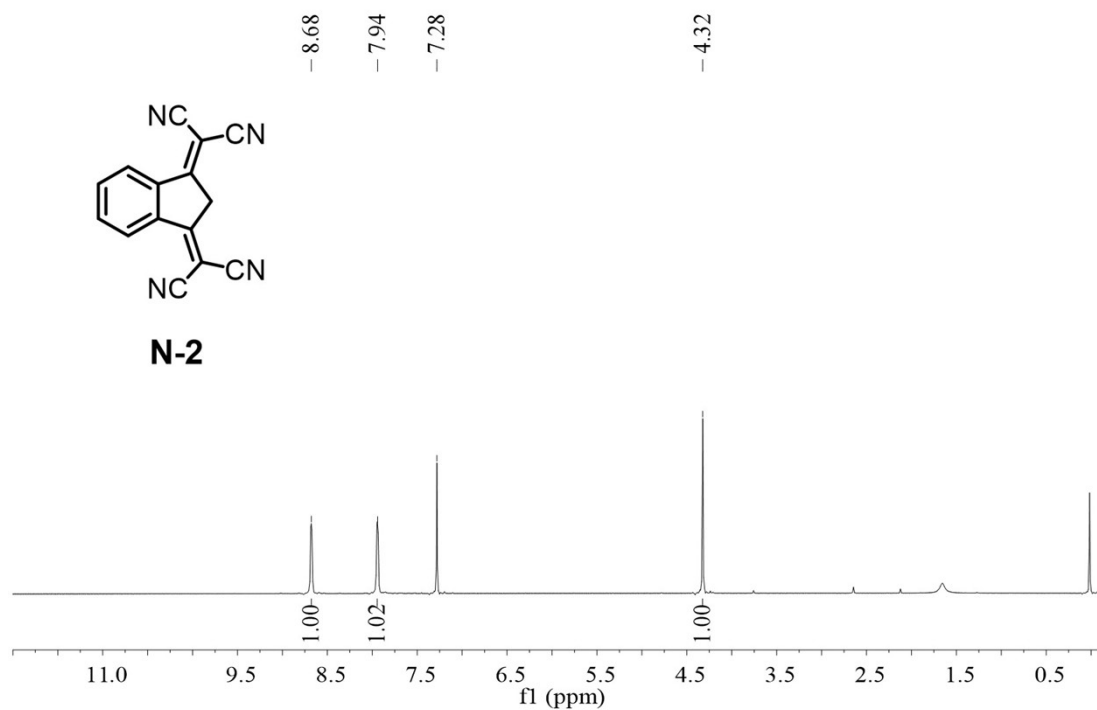

**Fig. S3.**  $^1\text{H}$  NMR spectrum of N-2 in  $\text{CDCl}_3$ .

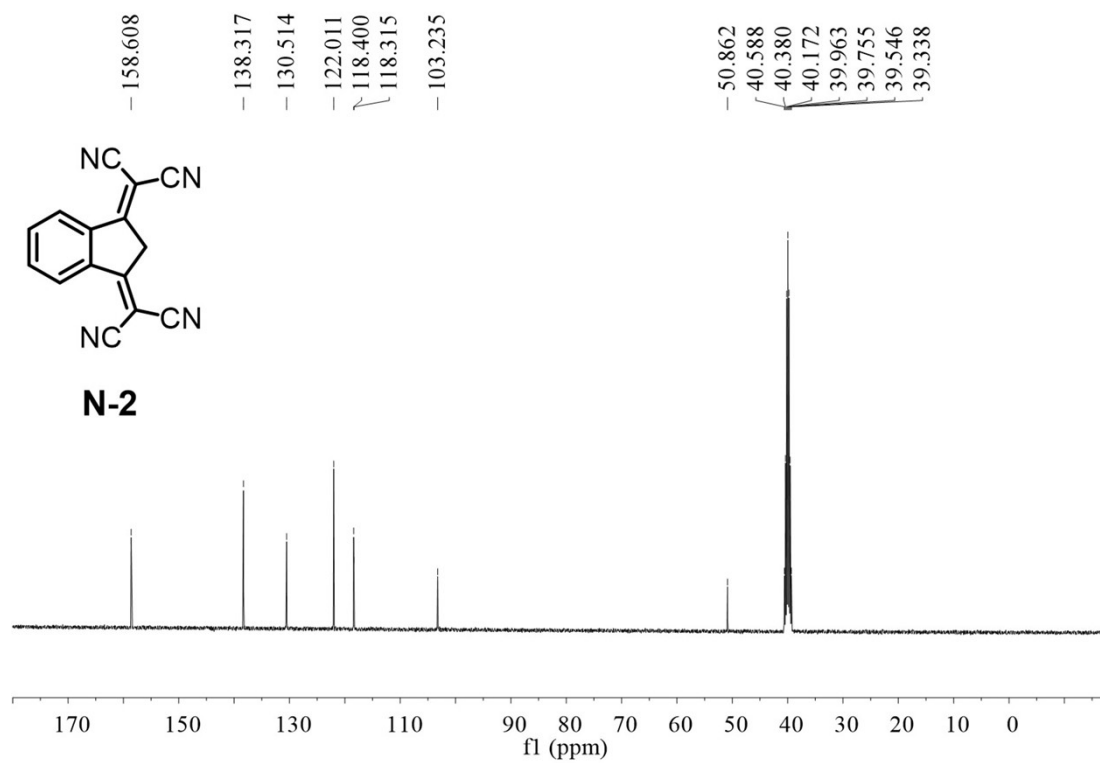

**Fig. S4.**  $^{13}\text{C}$  NMR spectrum of N-2 in  $\text{DMSO-}d_6$ .

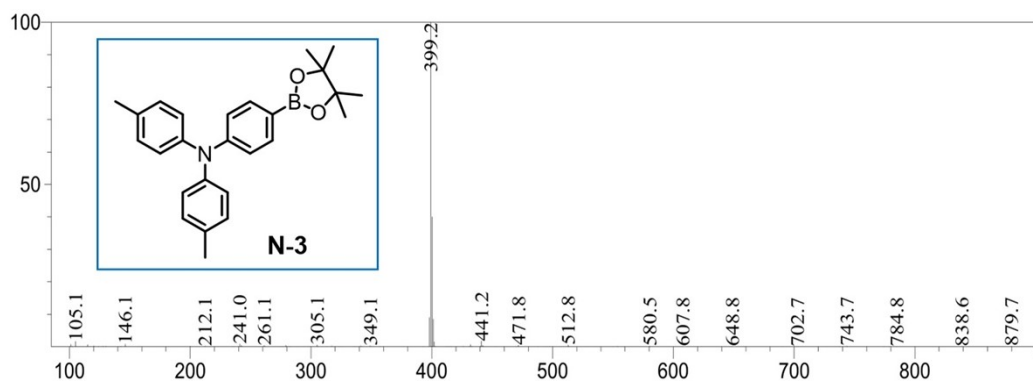

**Fig. S5.** LCMS of N-3.

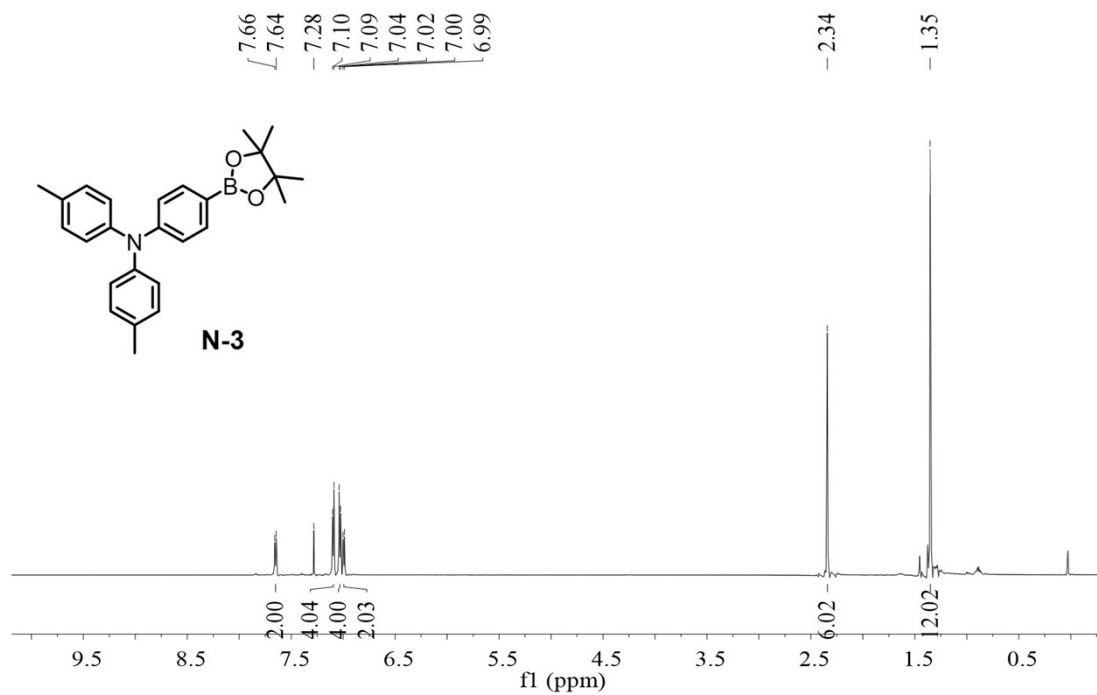

**Fig. S6.**  $^1\text{H}$  NMR spectrum of N-3 in  $\text{CDCl}_3$ .

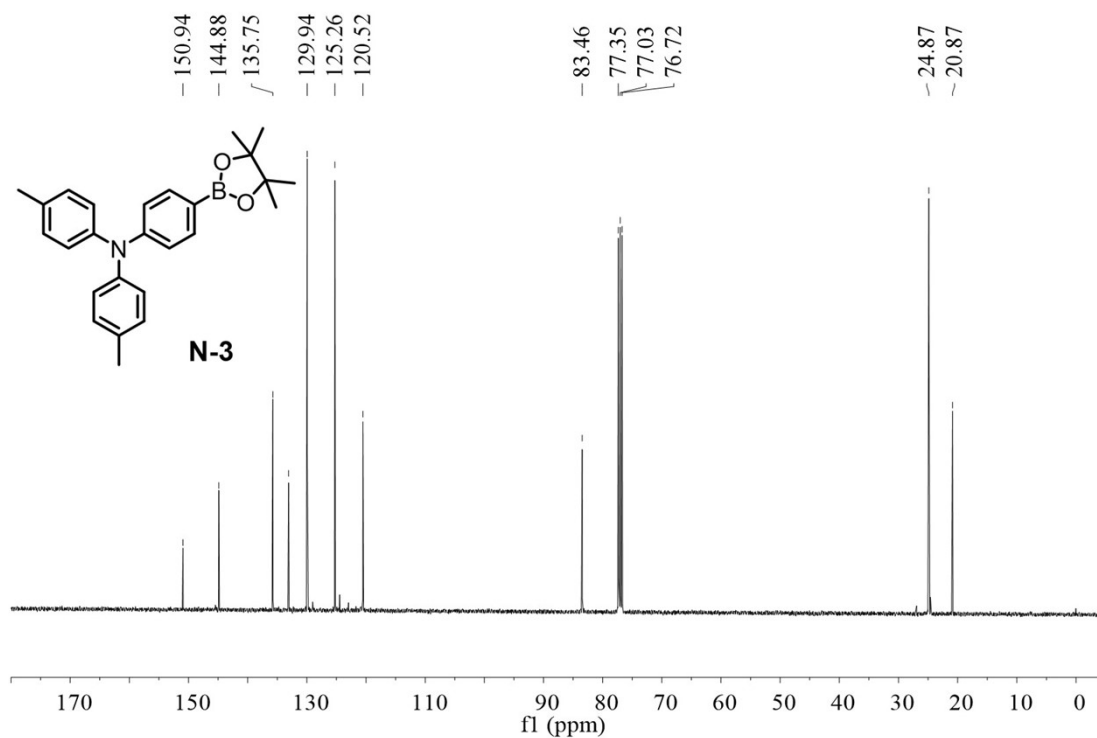

**Fig. S7.** <sup>13</sup>C NMR spectrum of N-3 in CDCl<sub>3</sub>.

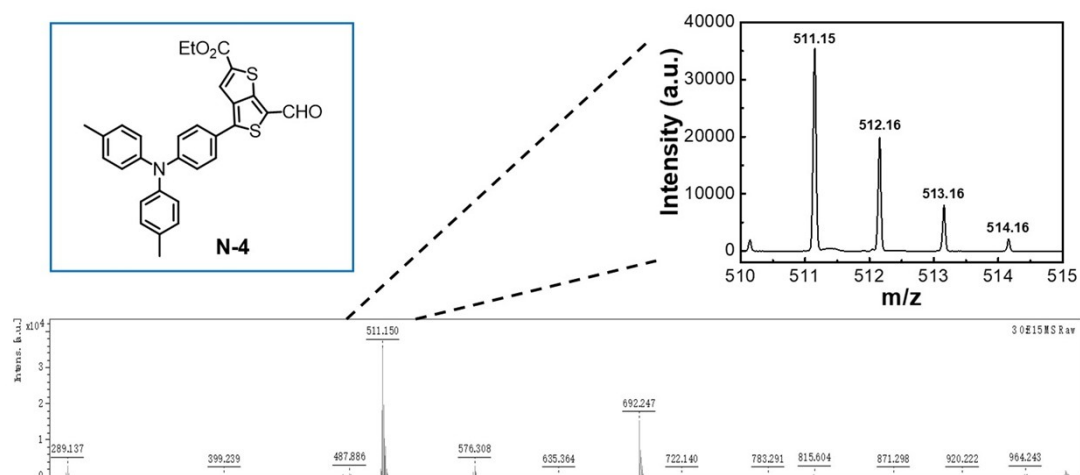

**Fig. S8.** MALDI-TOF of N-4.

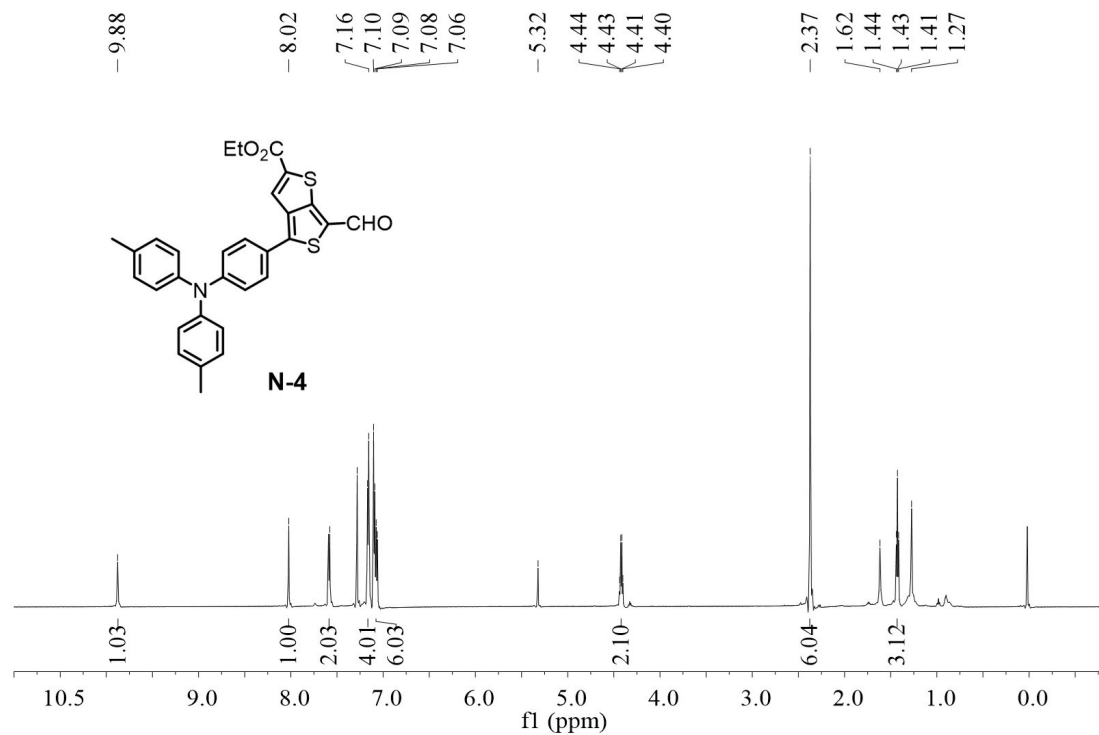

**Fig. S9.** <sup>1</sup>H NMR spectrum of N-4 in CDCl<sub>3</sub>.

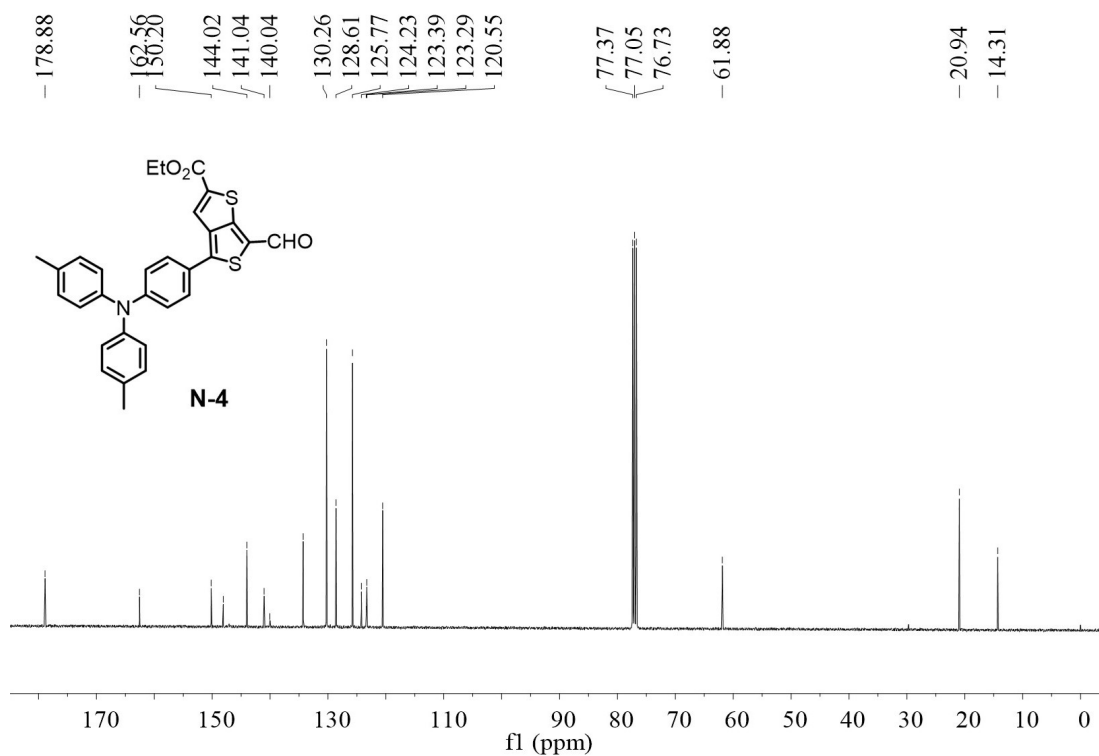

**Fig. S10.** <sup>13</sup>C NMR spectrum of N-4 in CDCl<sub>3</sub>.

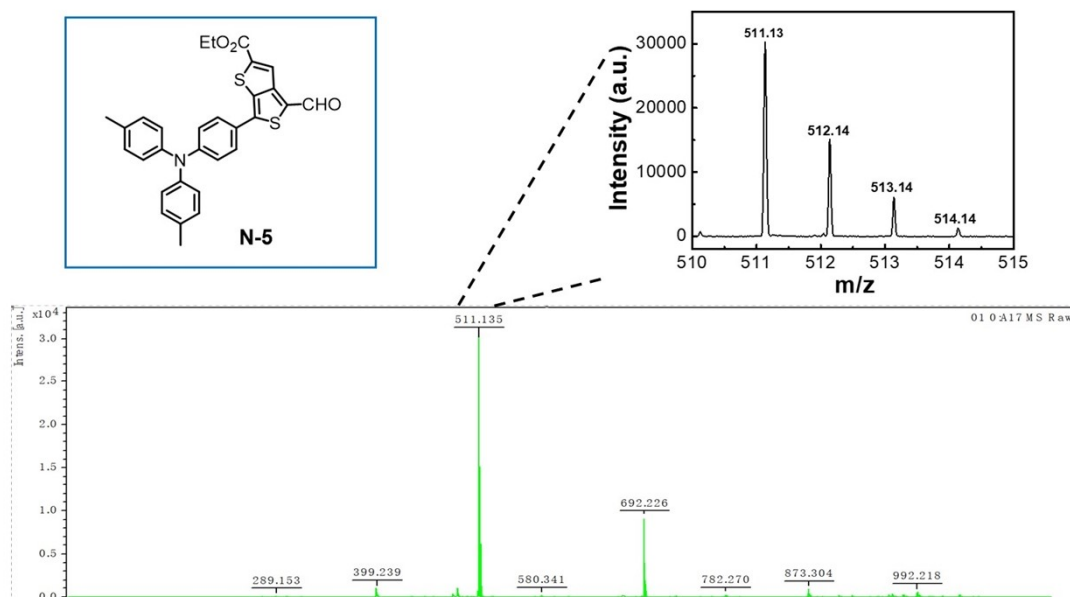

Fig. S11. MALDI-TOF of N-5.

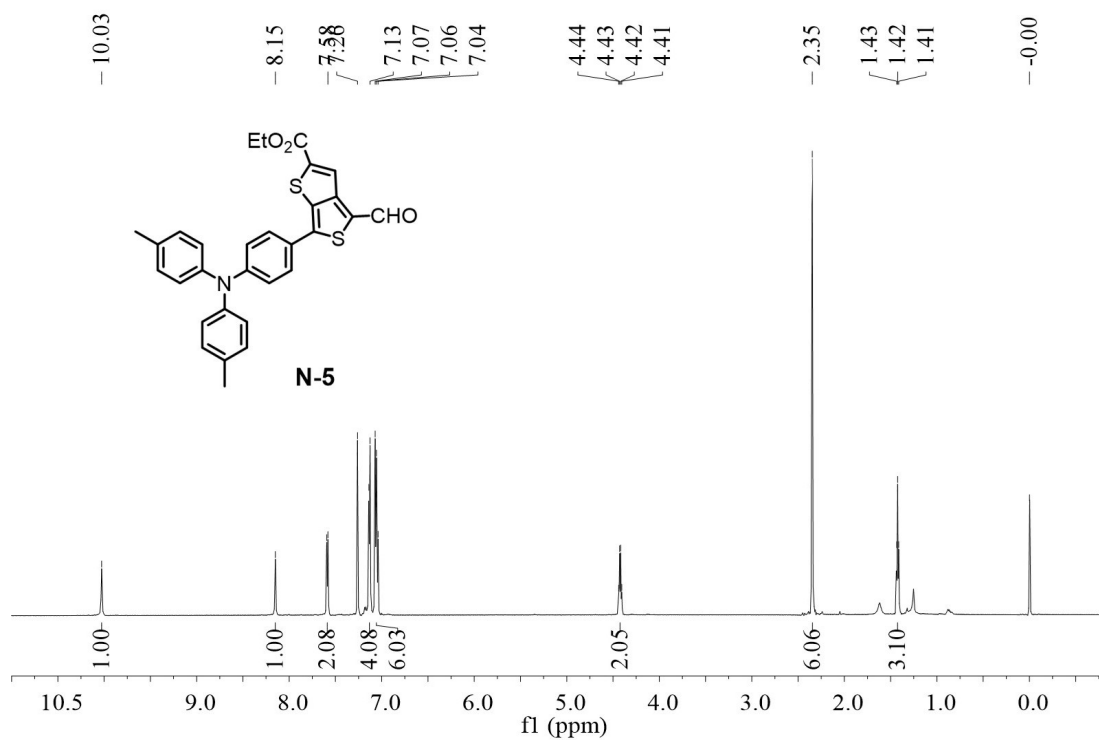

Fig. S12. <sup>1</sup>H NMR spectrum of N-5 in CDCl<sub>3</sub>.

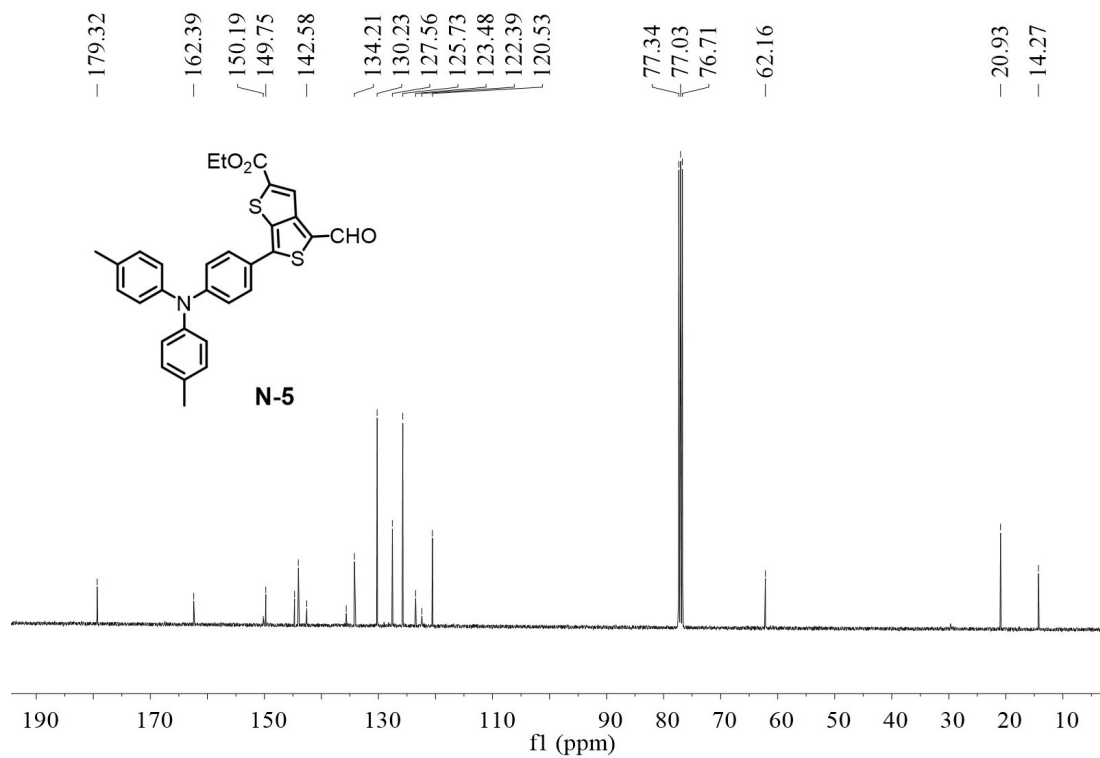

**Fig. S13.** <sup>13</sup>C NMR spectrum of N-5 in CDCl<sub>3</sub>.

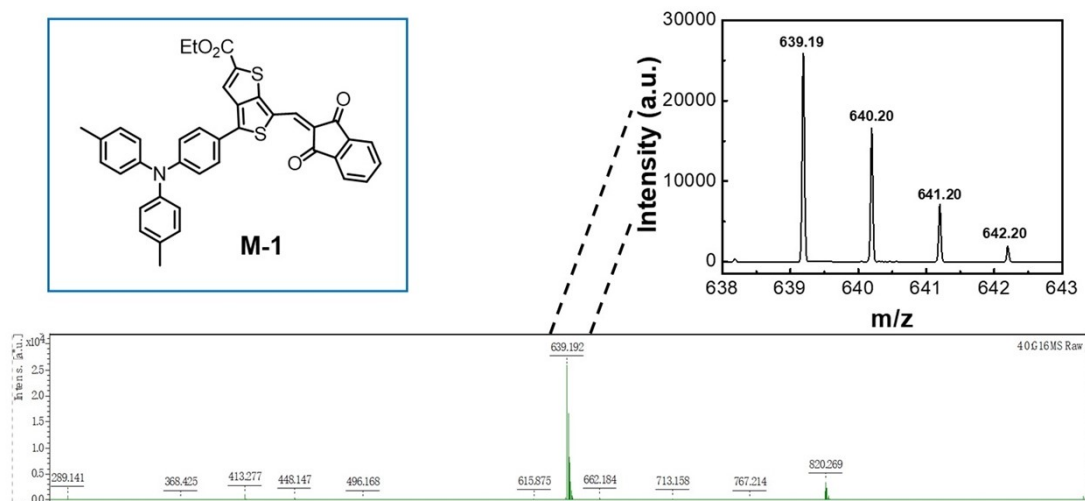

**Fig. S14.** MALDI-TOF of M-1.



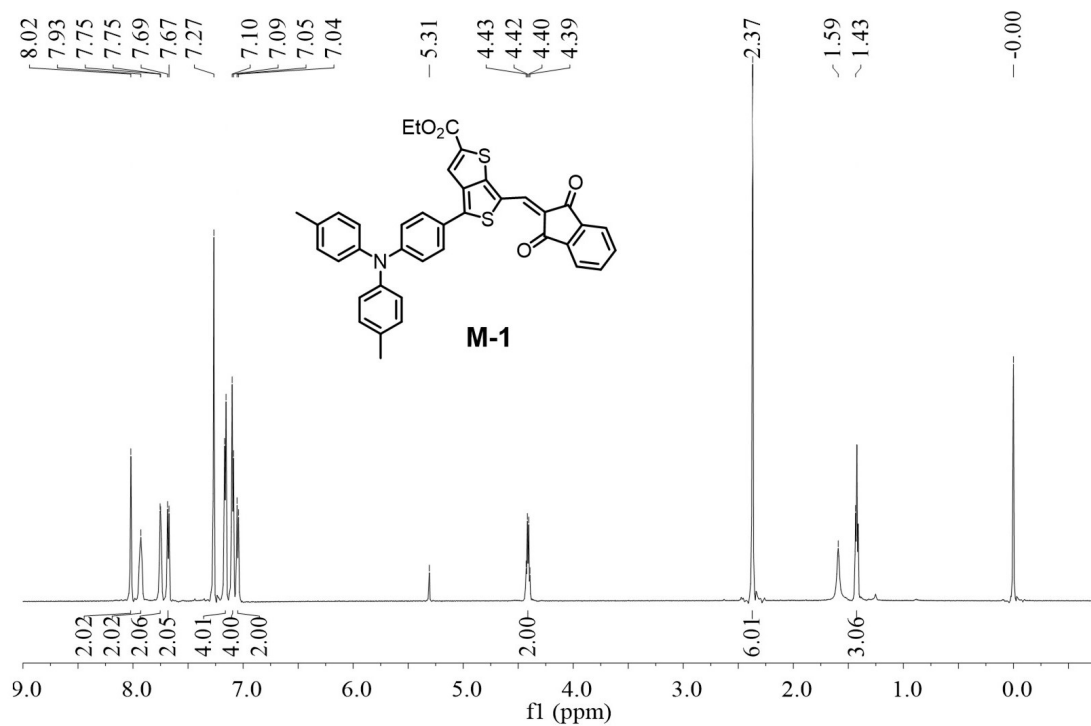

**Fig. S15.** <sup>1</sup>H NMR spectrum of M-1 in CDCl<sub>3</sub>.

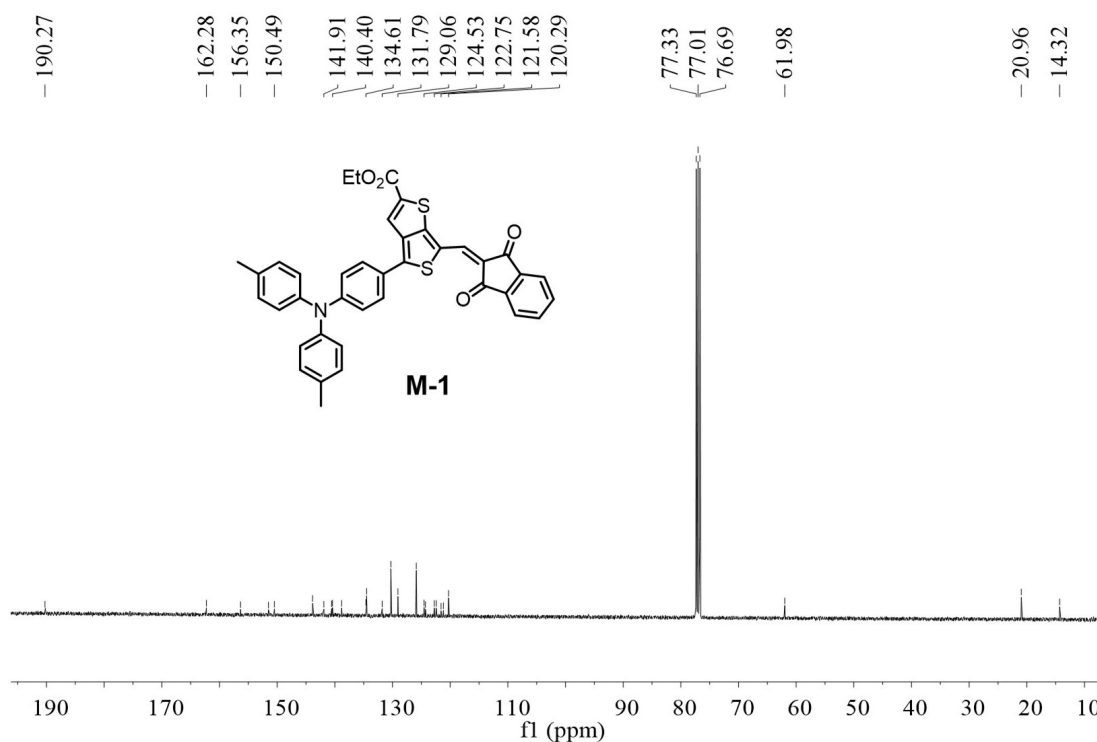

**Fig. S16.** <sup>13</sup>C NMR spectrum of M-1 in CDCl<sub>3</sub>.

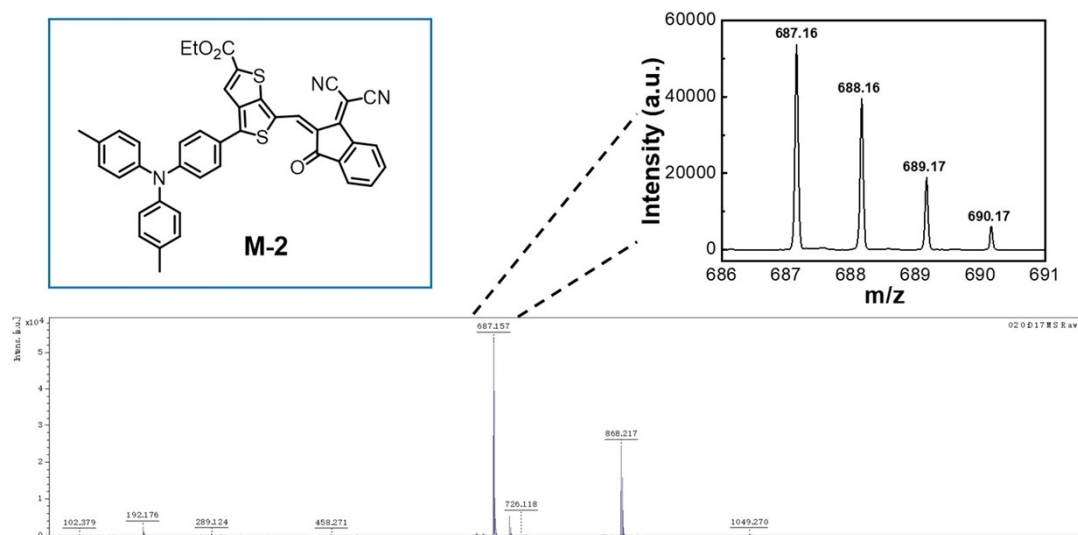

**Fig. S17.** MALDI-TOF of M-2.

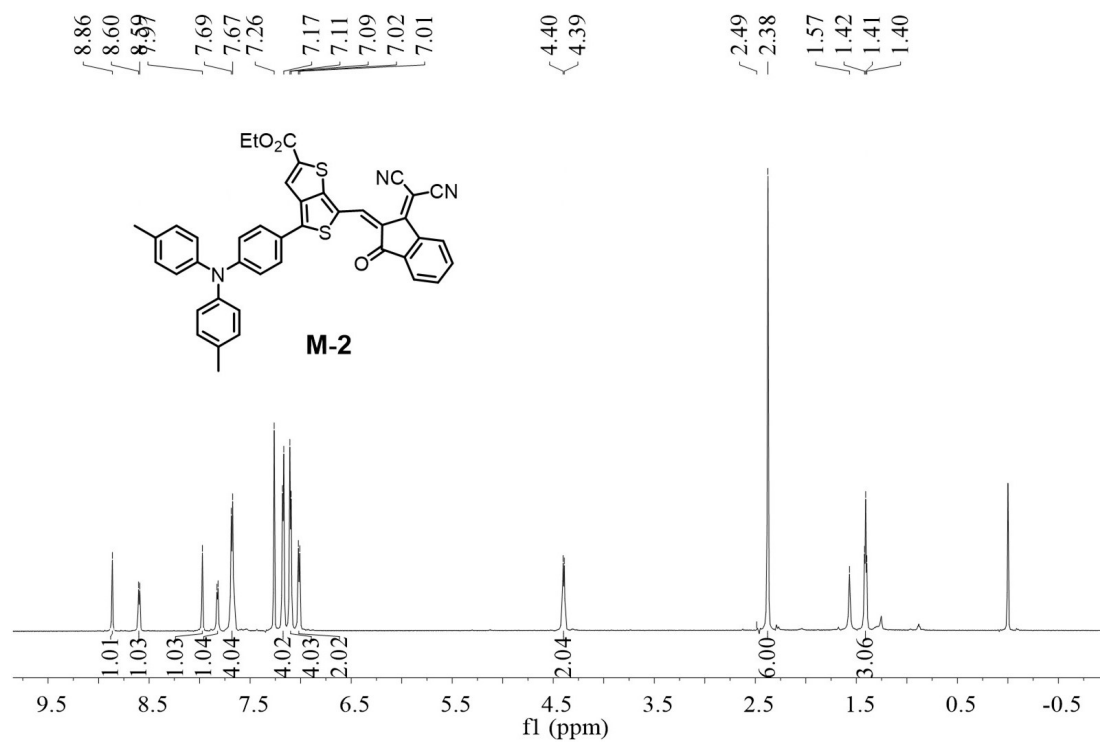

**Fig. S18.** <sup>1</sup>H NMR spectrum of M-2 in CDCl<sub>3</sub>.

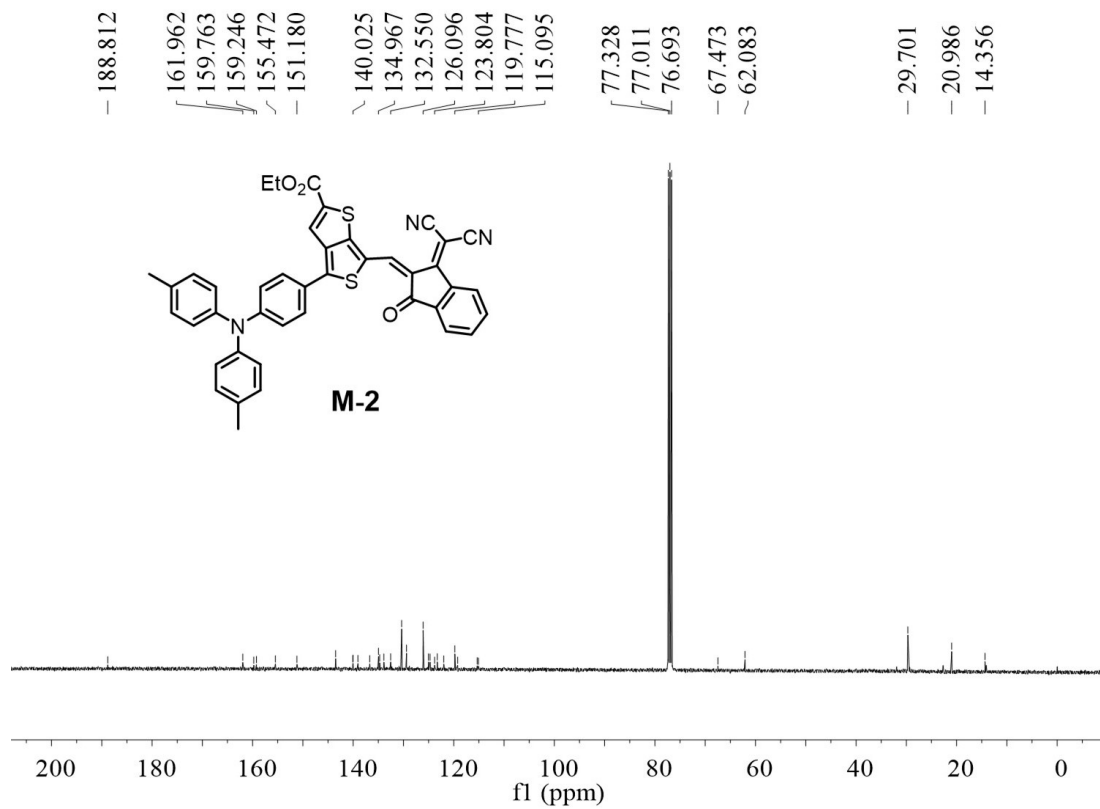

**Fig. S19.**  $^{13}\text{C}$  NMR spectrum of M-2 in  $\text{CDCl}_3$ .

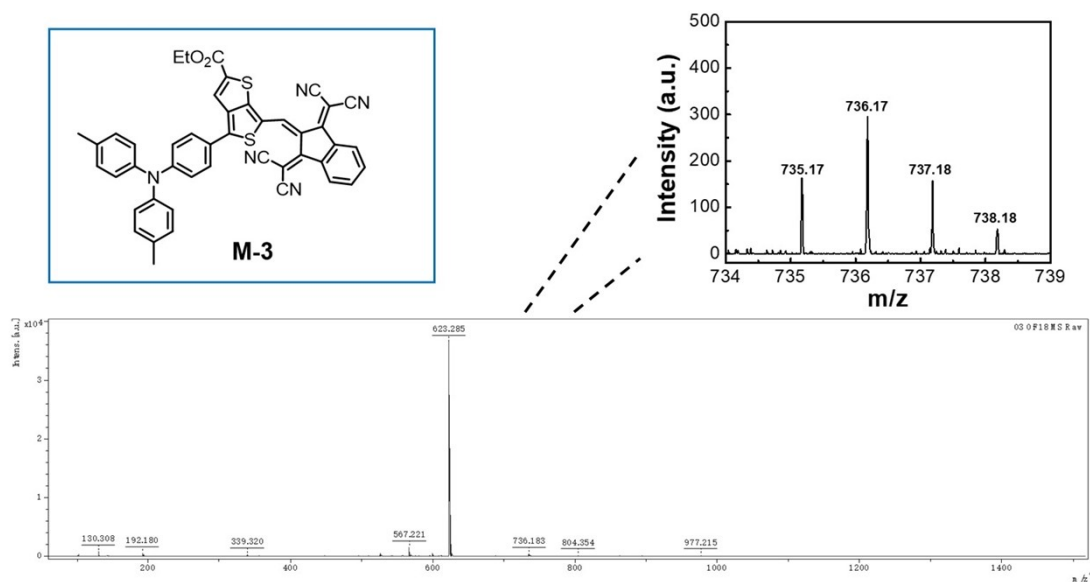

**Fig. S20.** MALDI-TOF of M-3.

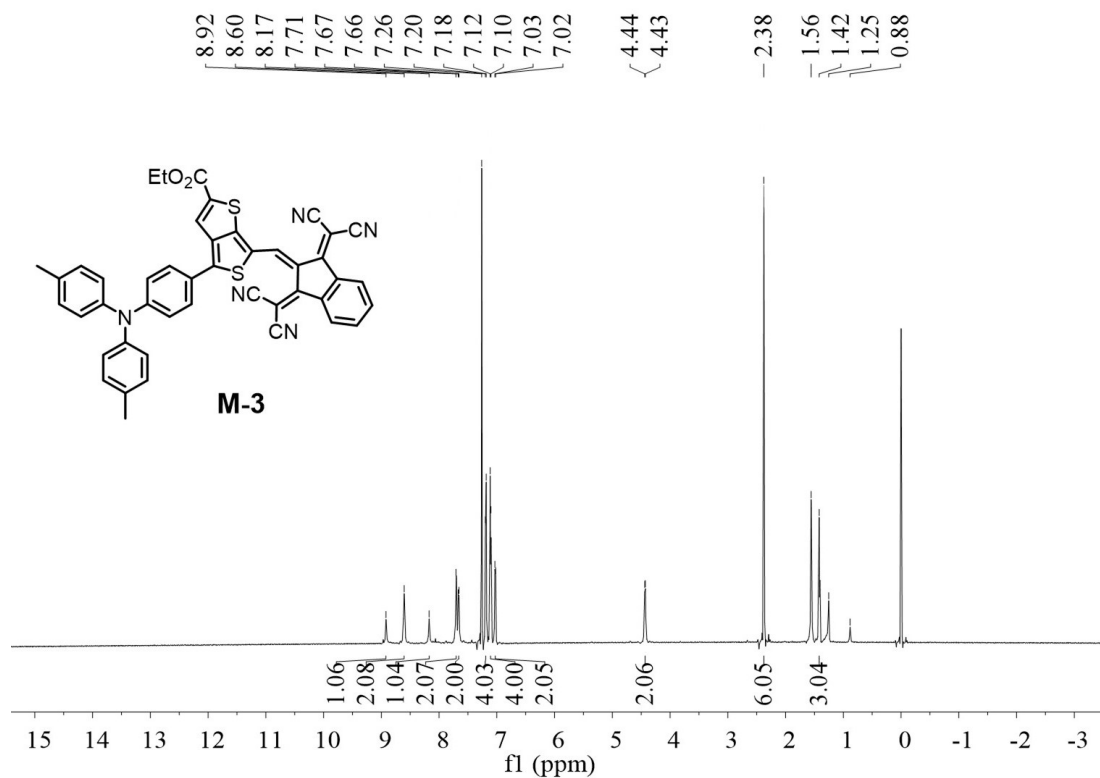

**Fig. S21.** <sup>1</sup>H NMR spectrum of M-3 in CDCl<sub>3</sub>.

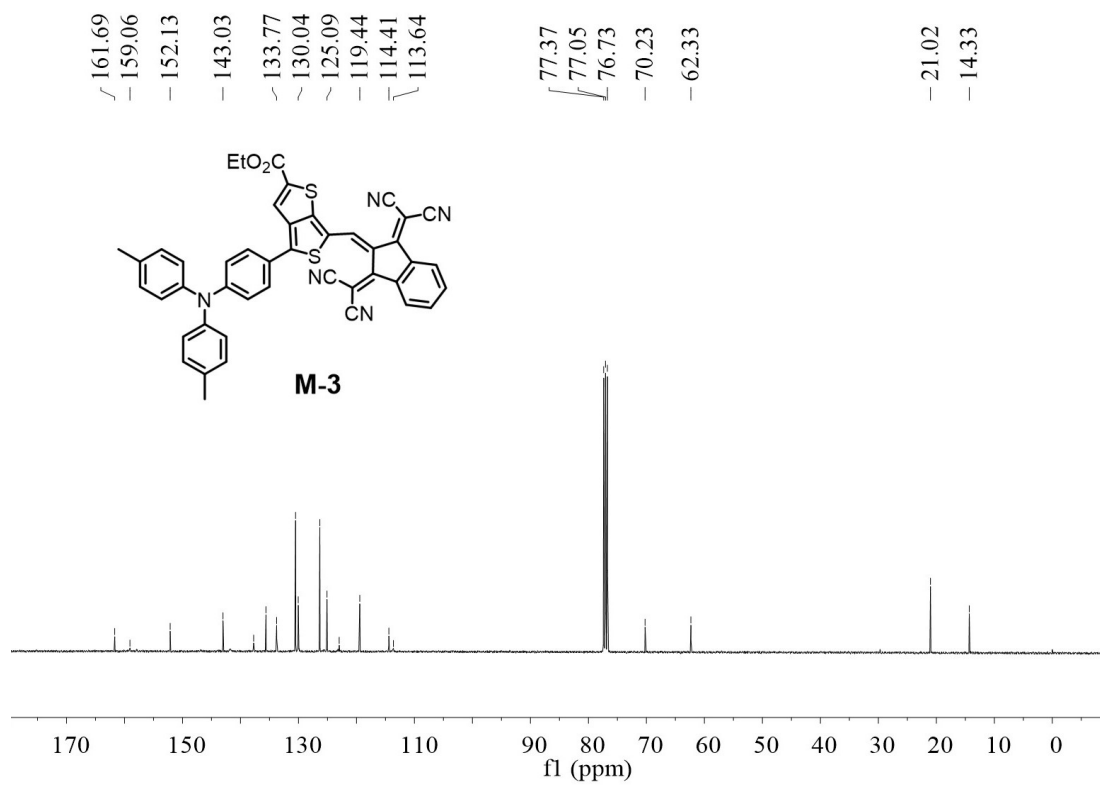

**Fig. S22.** <sup>13</sup>C NMR spectrum of M-3 in CDCl<sub>3</sub>.

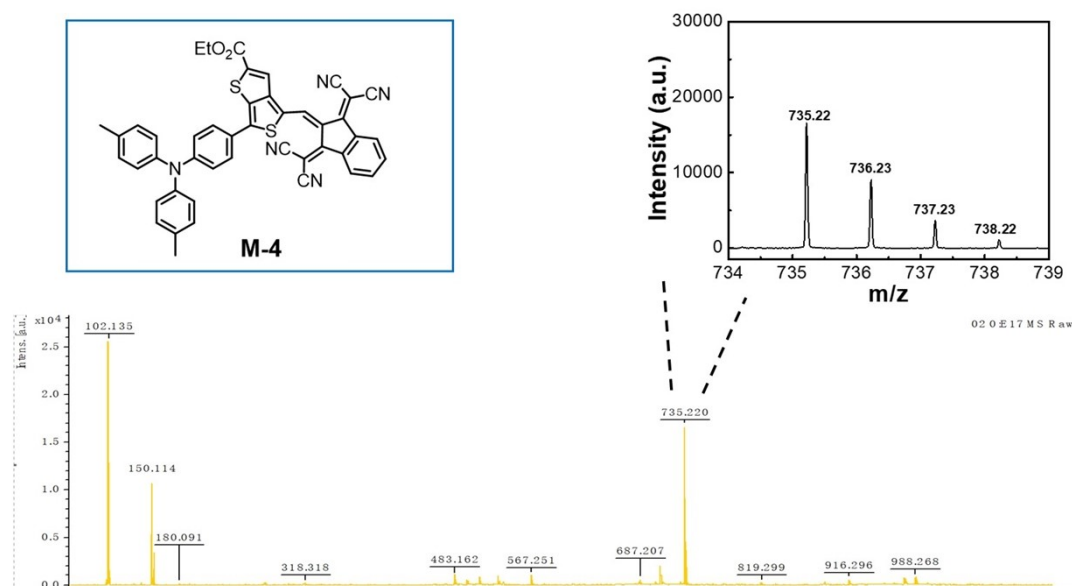

**Fig. S23.** MALDI-TOF of M-4.

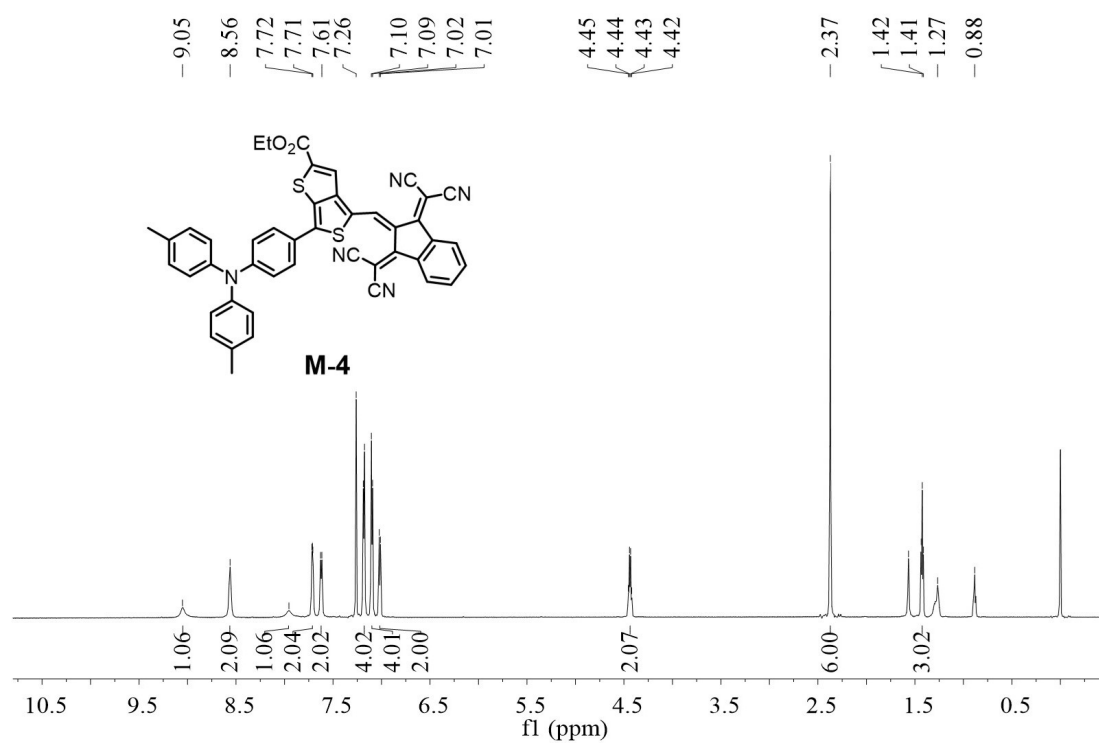

**Fig. S24.**  $^1\text{H}$  NMR spectrum of M-4 in  $\text{CDCl}_3$ .

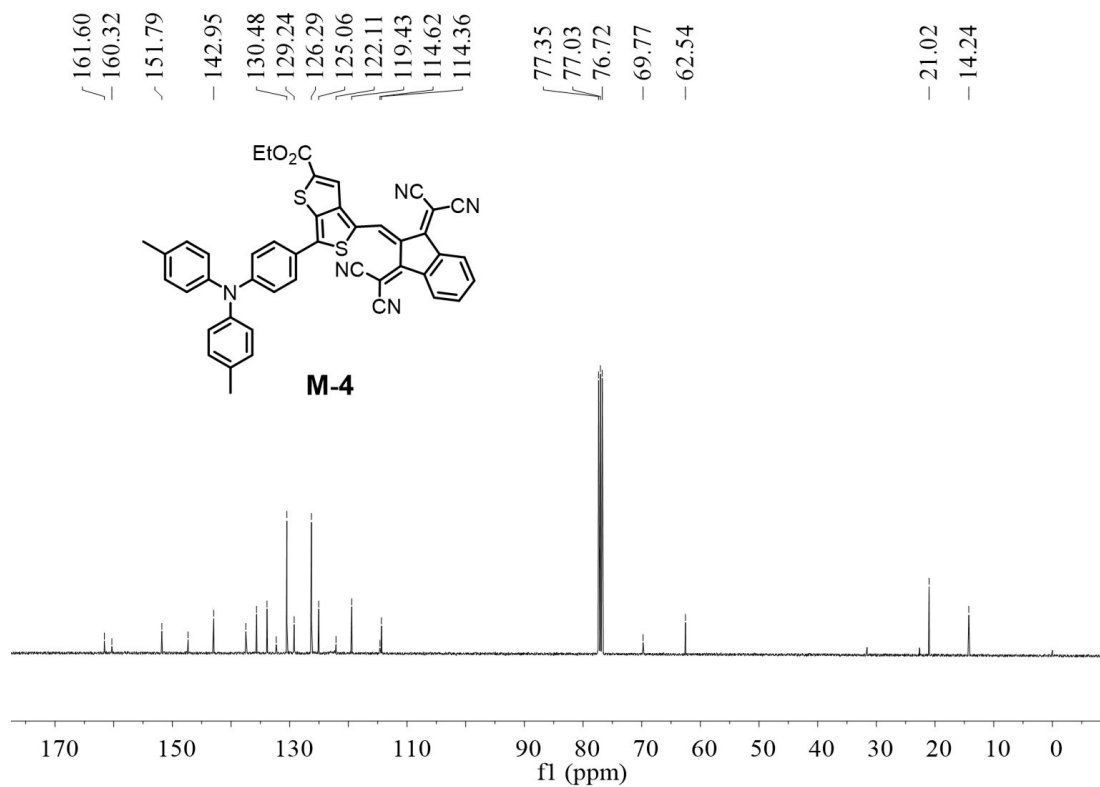

**Fig. S25.** <sup>13</sup>C NMR spectrum of M-4 in CDCl<sub>3</sub>.

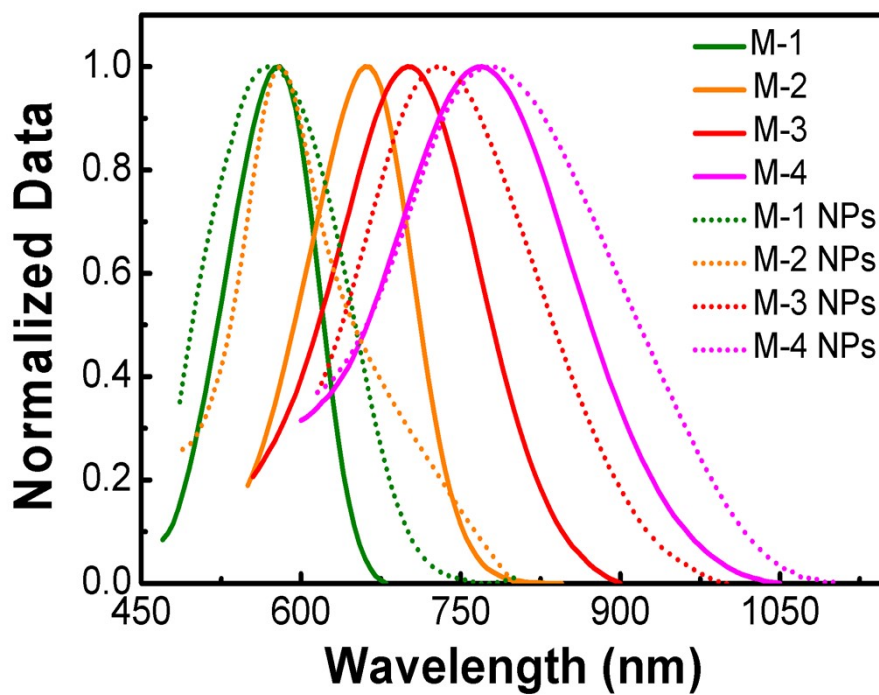

**Fig. S26.** Normalized absorption spectra of M-1, M-2, M-3 and M-4 in THF and M-1, M-2, M-3 and M-4 NPs in H<sub>2</sub>O.

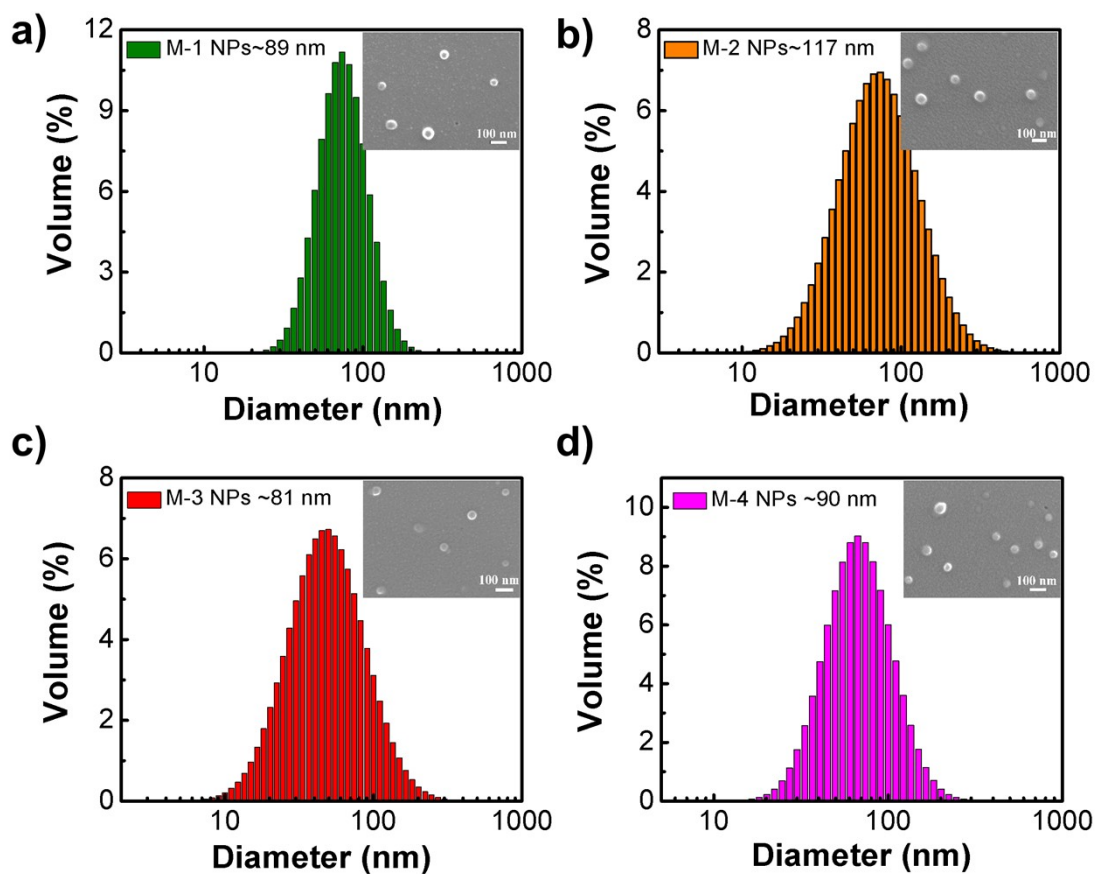

*Fig. S27.* Size distributions and SEM images of a) M-1 NPs, b) M-2 NPs, c) M-3 NPs, d) M-4 NPs.

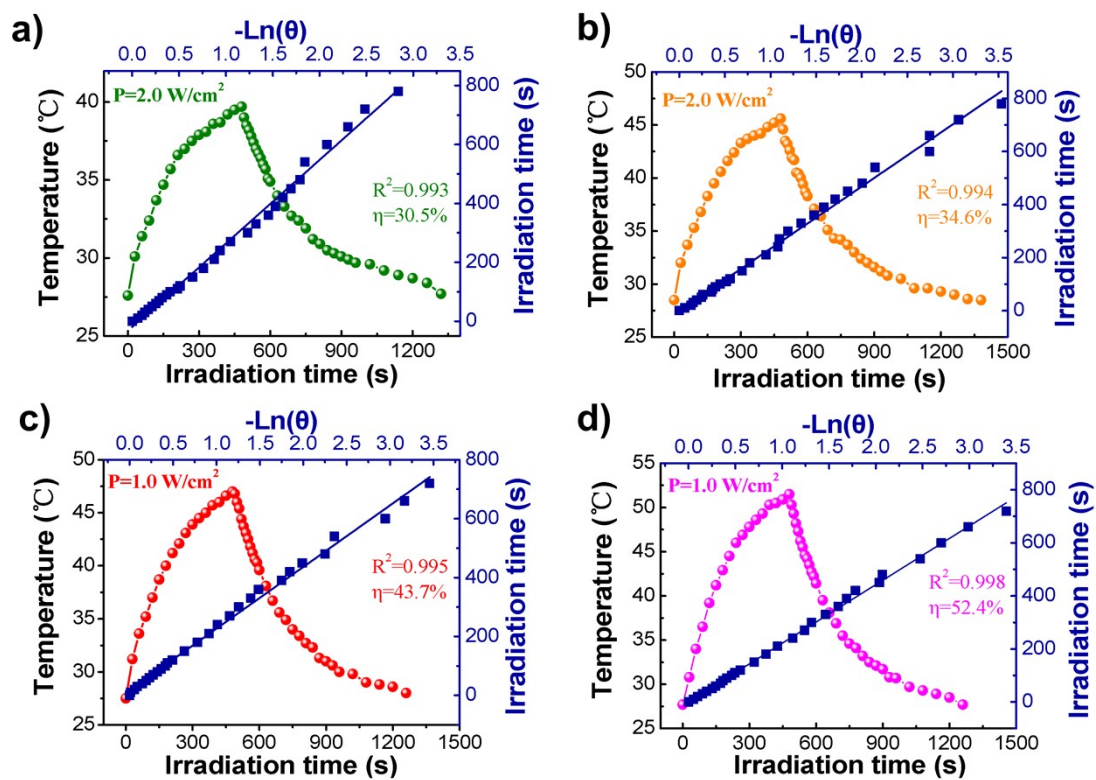

**Fig. S28.** Photothermal performance of a) M-1 NPs (20  $\mu\text{M}$ , 660 nm, 2  $\text{W}/\text{cm}^2$ ), b) M-2 NPs (20  $\mu\text{M}$ , 660 nm, 2  $\text{W}/\text{cm}^2$ ), c) M-3 NPs (10  $\mu\text{M}$ , 808 nm, 1  $\text{W}/\text{cm}^2$ ), and d) M-4 NPs (10  $\mu\text{M}$ , 808 nm, 1  $\text{W}/\text{cm}^2$ ) by cooling to room temperature with linear analysis.



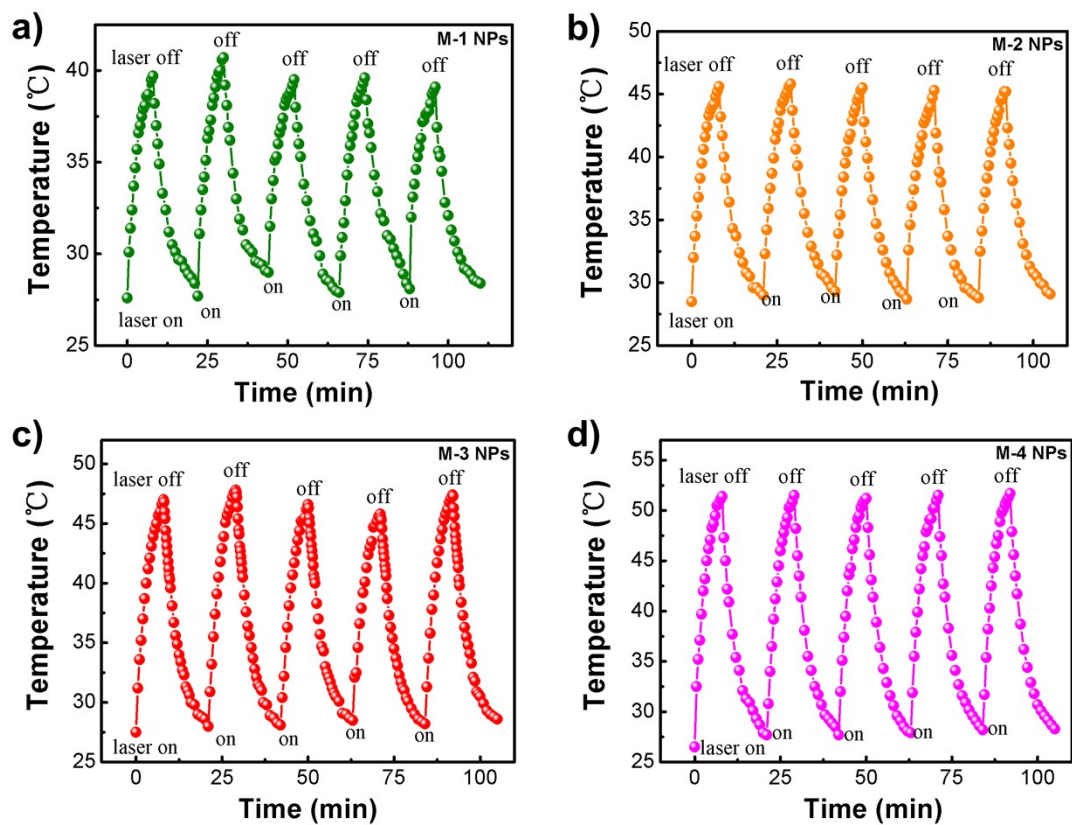

**Fig. S29.** Photothermal stability of a) M-1 NPs and b) M-2 NPs upon 660 nm laser irradiation (20  $\mu\text{M}$ , 2  $\text{W}/\text{cm}^2$ ). Photothermal stability of c) M-3 NPs and d) M-4 NPs upon 808 nm laser irradiation (10  $\mu\text{M}$ , 1  $\text{W}/\text{cm}^2$ ).

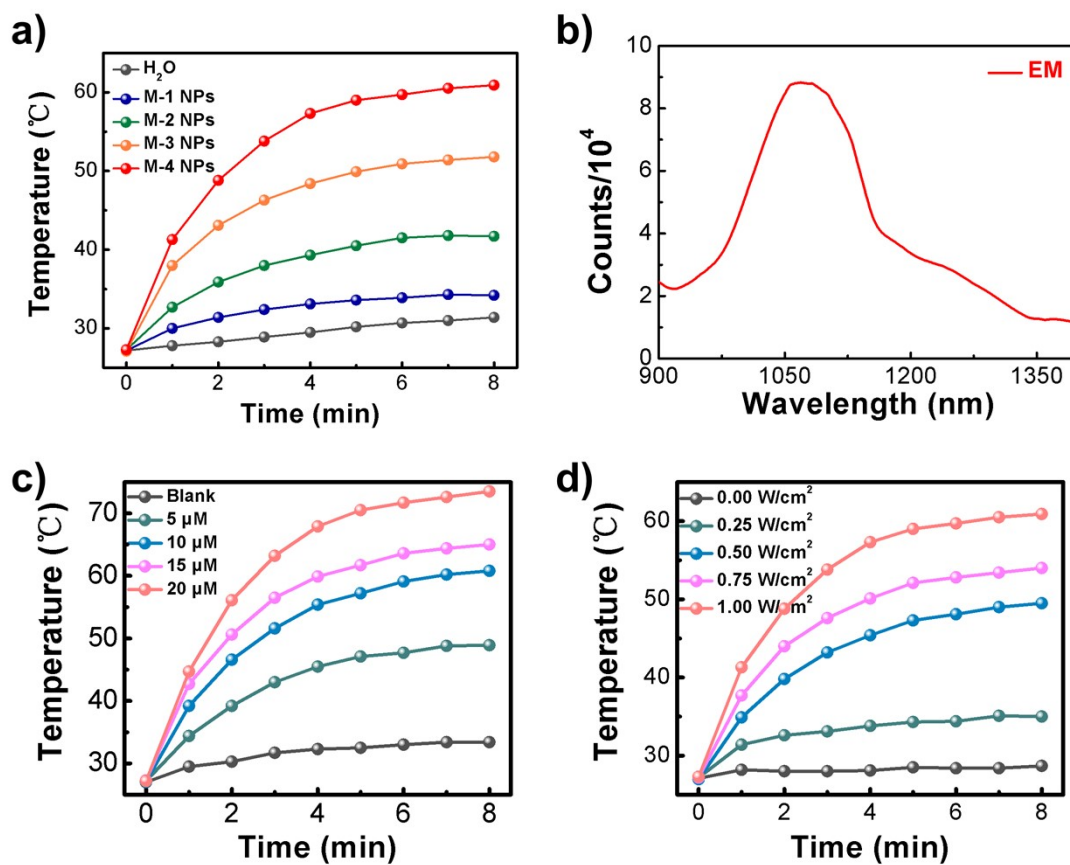

**Fig. S30.** a) Temperature changes of M-1 NPs, M-2 NPs, M-3 NPs and M-4 NPs (10 μM) in H<sub>2</sub>O under laser irradiation. b) PL spectrum of M-4 in solid state. c) Photothermal curves of M-4 NPs at different concentrations (0, 5, 10, 15, 20 μM) under 808 nm (1 W/cm<sup>2</sup>) laser irradiation. d) Photothermal curves of M-4 NPs (10 μM) under 808 nm laser irradiation at different power density (0.00, 0.25, 0.50, 0.75, and 1.00 W/cm<sup>2</sup>).

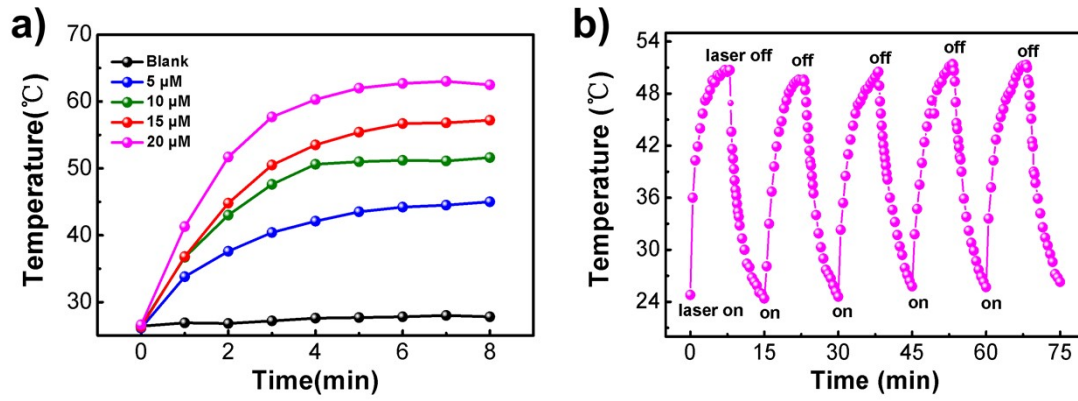

**Fig. S31.** a) Photothermal properties of AMDR hydrogels under irradiation of 808 nm laser (1 W/cm<sup>2</sup>) containing different concentrations of M-4 NPs (0, 5, 10, 15, 20 μM). b) Photothermal stability of AMDR hydrogel with M-4 NPs concentration of 10 μM under irradiation of 808 nm laser (1 W/cm<sup>2</sup>).

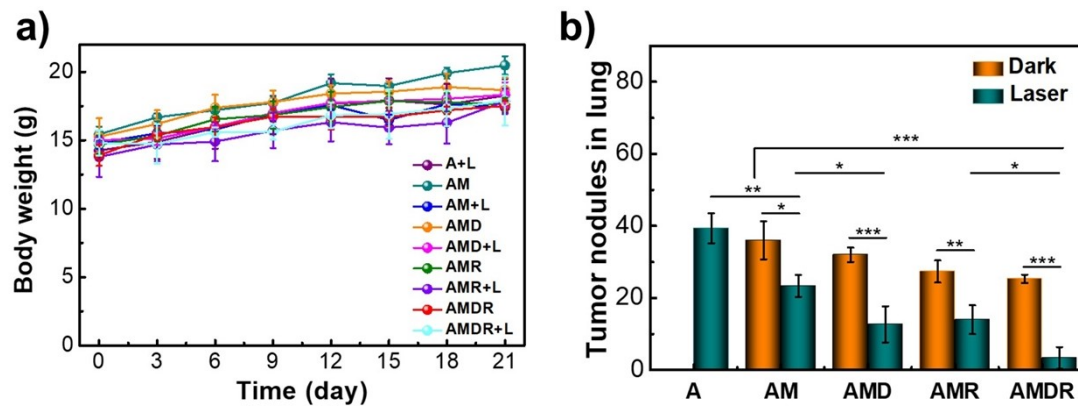

**Fig. S32.** a) Body weight changes of mice during different treatments. b) Numbers of tumor metastatic nodules in lung of mice (n = 5) after different treatments for 21 days. \*p < 0.05, \*\*p < 0.01, and \*\*\*p < 0.001.
